# Supplementary material for: Employee-Driven Innovation in Health Organizations: Insights From a Scoping Review
Source: PubMed Central journal article supplement (PMC10425658; doi:10.34172/ijhpm.2023.6734), 2023-05-15
Supplement: ijhpm-12-6734-s002.pdf [file ijhpm-12-6734-s002.pdf]

**Article title:** Employee-Driven Innovation in Health Organizations: Insights From a Scoping Review

**Journal name:** International Journal of Health Policy and Management (IJHPM)

**Authors' information:** Stephanie B.M. Cadeddu<sup>1,2\*</sup>, Labante Outcha Dare<sup>3</sup>, Jean-Louis Denis<sup>1,2,4</sup>

<sup>1</sup>Health Hub: politics, organizations, and law (H-POD), University of Montreal, Montreal, QC, Canada.

<sup>2</sup>University of Montreal Hospital Research Centre (CRCHUM), Montreal, QC, Canada.

<sup>3</sup>School of Public Health, University of Montreal, Montreal, QC, Canada.

<sup>4</sup>Department of Health Management, Evaluation and Policy, School of Public Health, University of Montreal, Montreal, QC, Canada

(\*Corresponding author: [stephanie.cadeddu@gmail.com](mailto:stephanie.cadeddu@gmail.com))

**Supplementary file 2.** Overview of the Extracted Literature

*Table S3: Analytical studies*

| Authors and date                      | Title                                                                                                                   | Category of study & Design                                                                                             | Country & Focused institution(s)          | Objectives/Research questions                                                                                                                                               | Study key focus |
|---------------------------------------|-------------------------------------------------------------------------------------------------------------------------|------------------------------------------------------------------------------------------------------------------------|-------------------------------------------|-----------------------------------------------------------------------------------------------------------------------------------------------------------------------------|-----------------|
| Afsar et al. (2017) <sup>49</sup>     | Do nurses display innovative work behavior when their values match with hospitals' values                               | 2b. Conceptual and empirical (quantitative: cross-sectional design)                                                    | Thailand-public sector hospitals          | To "examine how the fit between an employee's and his/her organization's characteristics impacts the employee's IWB [innovative work behaviour]" (p.158)                    | Enablers        |
| Blasco et al. (2019) <sup>50</sup>    | Incentives for public goods inside organizations: Field experimental evidence                                           | 2b. Conceptual and empirical (quantitative: natural field experiment)                                                  | USA-Massachusetts General Hospital        | "To examine what drives employees' participation and effort in tasks that are above and beyond their contractual duties." (p.214)                                           | Enablers        |
| Brooks and Scott (2006) <sup>51</sup> | Nursing and Healthcare Management and Policy: Exploring knowledge work and leadership in online midwifery communication | 2b. Conceptual and empirical (qualitative: case-study organizational research + interviews + naturalistic observation) | UK-non-teaching, acute hospital trust     | To understand based on "knowledge work theory ... how midwives can collaboratively communicate as knowledge workers to enhance knowledge creation, capture and use" (p.518) | Process         |
| Dearmon et al. (2013) <sup>52</sup>   | Transforming Care at the Bedside (TCAB): Enhancing Direct Care and Value-added Care                                     | 2b. Conceptual and empirical (mixed method: case-control study)                                                        | USA-urban, regional Level I trauma center | To "track and describe changes that resulted from the TCAB experience within the study hospital." (p.670)                                                                   | Benefits        |

|                                               |                                                                                                                       |                                                                                                                  |                                                             |                                                                                                                                                                                                            |                                              |
|-----------------------------------------------|-----------------------------------------------------------------------------------------------------------------------|------------------------------------------------------------------------------------------------------------------|-------------------------------------------------------------|------------------------------------------------------------------------------------------------------------------------------------------------------------------------------------------------------------|----------------------------------------------|
| Fitzpatrick and Riordan (2016) <sup>53</sup>  | Performance management of Clostridium difficile infection in hospitals the carrot or stick approach?                  | 2a. Conceptual (literature review)                                                                               | Not applicable                                              | To “review[...] the evidence base for these policy approaches with a focus on HAI [healthcare-associated infection] and specifically CDI [Clostridium difficile infection]” (p.9)                          | Process and benefits                         |
| Gomes et al. (2015) <sup>54</sup>             | The mediating effect of work engagement on the relationship between self-leadership and individual innovation         | 2b. Conceptual and empirical (quantitative)                                                                      | Portugal-Integrated health care unit                        | To “explore the relationship between self-leadership, work engagement and individual innovation.” (p. 1550009-1)                                                                                           | Enablers                                     |
| Grisot et al. (2014) <sup>55</sup>            | Innovation Of, In, On Infrastructures: Articulating the Role of Architecture in Information Infrastructure Evolution  | 2b. Conceptual and empirical (qualitative: case study)                                                           | Norway-Hospital                                             | To “understand which conditions enable successful innovation in a case where technology is an II [infrastructure innovation]” (p.198)                                                                      | Process and enablers                         |
| Knol and Van Linge (2009) <sup>56</sup>       | Innovative behaviour: the effect of structural and psychological empowerment on nurses                                | 2b. Conceptual and empirical (quantitative: cross-sectional correlational design)                                | Netherlands-General hospitals                               | To “investigate the relationship between structural empowerment/psychological empowerment and innovative behaviour” (p.361)                                                                                | Enablers                                     |
| Luz et al. (2019) <sup>12</sup>               | Characteristics and behaviours of formal versus informal nurse champions and their relationship to innovation success | 2b. Conceptual and empirical (quantitative: cross-sectional design using questionnaires and experts’ evaluation) | Israel-Medical centers                                      | To “identify the sociodemographic attributes, project characteristics, and champion strategies that differentiate formal and informal champions and to test these champions’ distinctive success” (p.n.a.) | Enablers                                     |
| Luz et al. (2019) <sup>57</sup>               | Nursing innovation: The joint effects of championship behaviors, project types, and initiation levels                 | 2b. Conceptual and empirical (quantitative: Cross-sectional design and multisource)                              | Israel-Medical centers                                      | To “develop and test an interactionist model of project innovation in nursing” (p.407)                                                                                                                     | Enablers                                     |
| Mu et al. (2018) <sup>11</sup>                | Employee involvement in ideation and healthcare service innovation quality                                            | 2b. Conceptual and empirical (quantitative : online questionnaire survey)                                        | Netherlands-Hospitals, medical centers, and group practices | To “identify the effects of frontline employee involvement in idea generation and of top management involvement in idea application on service innovation quality in the healthcare sector” (p.3)          | Enablers                                     |
| Vázquez-Calatayud et al. (2017) <sup>58</sup> | Transforming care in nursing: a concept analysis                                                                      | 2a. Conceptual                                                                                                   | Not applicable                                              | To “analyz[e] the concept of ‘Transforming care’ in nursing” (p.4) and to “identify[...] its uses, antecedents, attributes, consequences and empirical referents” (p.16)                                   | Definition, processes, enablers and benefits |
| Watanabe et al. (2015) <sup>59</sup>          | A Technology-Assisted Design Methodology for Employee-Driven Innovation in Services                                   | 2b. Conceptual and empirical (qualitative: interviews, data analysis and workshop)                               | Japan-Wakoen care home                                      | To “propose a technology-assisted design methodology for employees and conduct a case study to clarify its effectiveness for employee-driven innovation” (p.6)                                             | Process                                      |

|                                      |                                                                                                             |                                                                                                             |                                  |                                                                                                                                          |          |
|--------------------------------------|-------------------------------------------------------------------------------------------------------------|-------------------------------------------------------------------------------------------------------------|----------------------------------|------------------------------------------------------------------------------------------------------------------------------------------|----------|
| Yasir and Masid (2019) <sup>60</sup> | Boundary integration and innovative work behavior among nursing staff                                       | 2b. Conceptual and empirical (quantitative: cross-sectional design)                                         | Pakistan-Public sector hospitals | To “investigate the impact of boundary integration (BI) on innovative work behavior (IWB) of nursing staff” (p.3)                        | Enablers |
| Zuber and Moody (2018) <sup>39</sup> | Creativity and Innovation in Health Care Tapping into Organizational Enablers Through Human-Centered Design | 2b. Conceptual and empirical (qualitative: workshop employing an empathy map and semi-structured questions) | USA-Kaiser Permanente            | To “identify enabling conditions that support frontline nurses in their attempts to behave as champions of innovation and change” (p.65) | Enablers |

**Table S4: Descriptive studies**

| Authors and date                        | Title                                                                                                                                                                                                                                              | Category of study & Design                                   | Country & Focused institution (s)                  | Objectives/Research questions                                                                                                                                                 | Study key focus       |
|-----------------------------------------|----------------------------------------------------------------------------------------------------------------------------------------------------------------------------------------------------------------------------------------------------|--------------------------------------------------------------|----------------------------------------------------|-------------------------------------------------------------------------------------------------------------------------------------------------------------------------------|-----------------------|
| Allen et al. (2019) <sup>61</sup>       | Executive-level reviews of seclusion and restraint promote interdisciplinary collaboration and innovation                                                                                                                                          | 1b. Descriptive                                              | USA-New Hampshire Hospital                         | To “describe[...] the positive impact of developing a forum for “witnessing” instituted at the New Hampshire Hospital” (p.261)                                                | Process               |
| Altman and Brinker (2016) <sup>24</sup> | Nursing social entrepreneurship leads to positive change                                                                                                                                                                                           | 1a. Descriptive                                              | Sweden-Medical Center First Hill                   | To “discuss[...] how the concept of social entrepreneurship may lend support to clinical nurses leading sustainable change initiatives” (p.30)                                | Process               |
| Amador et al. (2016) <sup>62</sup>      | Evaluation of an organisational intervention to promote integrated working between health services and care homes in the delivery of end-of-life care for people with dementia — understanding the change process using a social identity approach | 1.c Evaluative (Mixed method study)                          | England-Care homes                                 | To “report[...] on the qualitative component of a mixed method study aimed at evaluating an organisational intervention shaped by Appreciative Inquiry ” (p.1)                | Process               |
| Bay and Carrier (2017) <sup>63</sup>    | L’aménagement de l’espace dans les établissements de santé : une expérience d’innovation sociale hospitalière                                                                                                                                      | 1a. Descriptive                                              | France-Hôpitaux universitaires de Strasbourg (HUS) | “To take stock of the methods experimented by La Fabrique de l’Hospitalité in recent years and the results obtained.” (our translation) (p.28)                                | Process               |
| Bourdon (2014)                          | Frontline Innovations: Implementing evidence-based care for patients with obstructive sleep apnea: The Official Voice of Perioperative Nursing                                                                                                     | 1a. Descriptive                                              | USA-Midwest Orthopedic Specialty Hospital          | To “share [team members]... experience implementing evidence-based care for patients with obstructive sleep apnea (OSA) in the perioperative setting” (p.C5)                  | Process               |
| Brown (2008) <sup>65</sup>              | Design thinking                                                                                                                                                                                                                                    | 1a. Descriptive                                              | USA-Kaiser Permanente                              | To present the case of “Kaiser[‘s] Garfield Innovation Center” (p.88)                                                                                                         | Process               |
| Casati et al. (2010) <sup>35</sup>      | From actors to authors — a first account about the involvement of patients in the informed consent governance of a major Italian translational research hospital                                                                                   | 1a. Descriptive                                              | Italy- Ed Dardanell Heart and Vascular Center      | To examine a foundation’s investment in “participatory action to promote good practice of informed consent” (p.231)                                                           | Process               |
| Dearmon et al. (2015) <sup>66</sup>     | Bridge to shared governance: Developing leadership of frontline nurses                                                                                                                                                                             | 1c. Descriptive (qualitative study, participant observation) | USA-Hospital level I trauma with                   | To “describe the process used to build leadership capacity of frontline nurses ... engaged in change processes to resolve interdisciplinary operational failures” (p.70)      | Enablers and benefits |
| Donahue et al. (2008) <sup>67</sup>     | Nurturing Innovation in the Critical Care Environment: Transforming Care at the Bedside                                                                                                                                                            | 1a. Descriptive                                              | USA-UPMC Shadyside                                 | To “discuss [the] implementation of the TCAB project at UPMC Shadyside as the vehicle to nurture care delivery innovation across settings in acute and critical care” (p.465) | Enablers and benefits |

|                                                 |                                                                                                                                                  |                                                                       |                                                      |                                                                                                                                                                                      |                      |
|-------------------------------------------------|--------------------------------------------------------------------------------------------------------------------------------------------------|-----------------------------------------------------------------------|------------------------------------------------------|--------------------------------------------------------------------------------------------------------------------------------------------------------------------------------------|----------------------|
| Dubrovsky et al. (2016) <sup>68</sup>           | “We should talk” — Moving knowledge into action by learning to engage patients, families, and healthcare staff to communicate for patient safety | 1a. Descriptive                                                       | Canada-Montreal Children’s Hospital                  | To “outline[...] the development and implementation of the We Should Talk Campaign launched in October 2015” (p.141)                                                                 | Process              |
| Edwards (2012) <sup>69</sup>                    | Redesigning the response to patients with trauma                                                                                                 | 1b. Descriptive and evaluative                                        | Australia-Westmead Hospital                          | To “launch[...] a redesign project to identify why these problems were arising and how they could be solved” (p.31)                                                                  | Process              |
| Eines et al. (2019) <sup>70</sup>               | Discourse analysis of health providers’ experiences using service design                                                                         | 1c. Evaluative (Discourse analysis based on participants’ experience) | Norway-Nursing home                                  | To “explore nurses and nurse assistants’ experiences using service design in a nursing home” (p.85)                                                                                  | Process and enablers |
| Eines and Vatne (2018) <sup>71</sup>            | Nurses and nurse assistants’ experiences with using a design thinking approach to innovation in a nursing home                                   | 1c. Evaluation (Qualitative)                                          | Norway-Nursing home                                  | To “evaluate nurses’ and nurse assistants’ experiences of using a design thinking approach in a nursing home in Norway” (p.429)                                                      | Process and enablers |
| Fieldston et al. (2016) <sup>72</sup>           | Developing the Capacity for Rapid-Cycle Improvement at a Large Freestanding Children’s Hospital                                                  | 1b. Descriptive                                                       | USA-Children’s Hospital of Philadelphia              | To “design and pilot a quality improvement model that would engage frontline staff and ultimately lead to measurable improvements in patient- and hospital-level outcomes” (p.445)   | Process              |
| Garcia (1996) <sup>73</sup>                     | Moving Change Through the System: A Model for Staff Involvement                                                                                  | 1a. Descriptive                                                       | USA-Beth Israel Medical Center                       | To “describe[...] how [c]areful development of a staff committee leads to a creative approach to problems” (p.n.a.)                                                                  | Process              |
| Garci et al. (2011) <sup>74</sup>               | Advancing Innovation in Health Care Leadership                                                                                                   | 1a. Descriptive                                                       | USA-Mercy Medical Center                             | To examine “one hospital’s collaborative approach to meet the increasing demands of nursing and other hospital leaders” (p.242)                                                      | Enablers             |
| Gonzales et al. (2017) <sup>75</sup>            | Caring Wisely: A Program to Support Frontline Clinicians and Staff in Improving Healthcare Delivery and Reducing Costs                           | 1b. Descriptive                                                       | USA-University of California, San Francisco’s Health | To “describe a program called “Caring Wisely”®” (p.662)                                                                                                                              | Process              |
| Govindarajan and Ramamurti (2018) <sup>76</sup> | Transforming Health Care from the Ground Up                                                                                                      | 1a. Descriptive                                                       | USA-University of Mississippi Medical Center         | To “look at two examples of bottom-up innovation involving a radical transformation of healthcare delivery” (p.6)                                                                    | Enablers             |
| Harvey and Sotardi (2018) <sup>16</sup>         | Carlson’s Law and the Power of Frontline Innovation                                                                                              | 1a. Descriptive                                                       | USA-Massachusetts General Hospital                   | To “explore Carlson’s Law and how it can inform our approach to innovation” (p.86)                                                                                                   | Enablers             |
| Hasu et al. (2014) <sup>77</sup>                | Learning employee-driven innovating: Towards sustained practice through multi-method evaluation                                                  | 1c. Evaluative                                                        | Finland-Shared service centre                        | “...to introduce a workshop process to enhance the learning of employee-driven innovating (LEDI) and to evaluate in multiple ways the practical effects of the LEDI process” (p.310) | Process              |
| Kerridge (2012) <sup>78</sup>                   | Leading change: 1—identifying the issue                                                                                                          | 1a. Descriptive                                                       | UK-NHS                                               | To “help nurses at all levels develop the knowledge and skills they will need to initiate and manage change” (p.12)                                                                  | Process              |

|                                           |                                                                                                                                                       |                                     |                                                           |                                                                                                                                                                                                                |                      |
|-------------------------------------------|-------------------------------------------------------------------------------------------------------------------------------------------------------|-------------------------------------|-----------------------------------------------------------|----------------------------------------------------------------------------------------------------------------------------------------------------------------------------------------------------------------|----------------------|
| Knoff (2019) <sup>25</sup>                | A call for nurses to embrace their innovative spirit                                                                                                  | 1a. Descriptive                     | USA-Gillette Children's Specialty Healthcare              | To "share the author's experiences throughout the process of conceptualizing and operationalizing an innovation" and "obtaining a patent and taking her idea to practice" (p.n.a.)                             | Process and enablers |
| Laing et al. (2016) <sup>79</sup>         | A quasi-experimental evaluation of performance improvement teams in the safety-net: A labor-management partnership model for engaging frontline staff | 1c. Evaluative (mixed method study) | USA-Martin Luther King, Jr. Outpatient Center             | To "investigate[...] if staff ... who received UBT [Unit-Based Training] training reported greater increases in adaptive reserve" (p.E2)                                                                       | Process and benefits |
| Lavoie-Tremblay (2004) <sup>80</sup>      | Creating a healthy workplace: A participatory organizational intervention                                                                             | 1c. Evaluative (qualitative)        | Canada-Hospital center                                    | To "present[...] recent information on healthcare workers who have experienced a participatory organizational intervention" (p.569)                                                                            | Process and enablers |
| Lindeman et al. (2003) <sup>81</sup>      | Changing practice in residential aged care using participatory methods                                                                                | 1b. Evaluative                      | Australia-Residential care                                | To "report[...] on an action research component of a project aimed at enhancing the social and physical health and well being of residents of aged care settings" (p.23)                                       | Process and enablers |
| Marra et al. (2013) <sup>82</sup>         | Positive Deviance: A New Tool for Infection Prevention and Patient Safety                                                                             | 1a. Descriptive                     | Brazil-Hospital Israelita Albert Einstein                 | To discuss "the structure and the process of PD [positive deviance], and its ability to offer a space for experience discussions, changing ideas and making plans that emerge from team participation" (p.544) | Process              |
| Meredith et al. (2018) <sup>83</sup>      | Long-term impact of evidence-based quality improvement for facilitating medical home implementation on primary care health professional morale        | 1c. Evaluative (quantative)         | USA-Medical center and community-based outpatient clinics | To explore whether "transformation to the patient-centered medical home model [was] associated with improved primary care practice morale ... over time" (pp.2-3)                                              | Benefits             |
| Needleman et al. (2016) <sup>84</sup>     | Engaging Frontline Staff in Performance Improvement: The American Organization of Nurse Executives Implementation of Transforming Care                | 1c. Evaluative (Mixed methods)      | USA-Hospitals                                             | To "examine the processes implemented at the unit level to conduct the improvement work and assess the effectiveness of the TCAB program using multiple data" (p.67)                                           | Benefits             |
| Neuwirth et al. (2012) <sup>85</sup>      | Innovation profile: How Kaiser Permanente Uses Video Ethnography of Patients for Quality Improvement, Such as In Shaping Better Care Transitions      | 1a. Descriptive                     | USA-Kaiser Permanente                                     | To describe the case of "Kaiser Permanente's Care Management Institute [which] adapted video ethnography to learn from the experiences of patients, family members, and caregivers" (p.1244)                   | Process              |
| Owen et al. (1988) <sup>86</sup>          | Changing visiting policy                                                                                                                              | 1a. Descriptive                     | USA-Medical and Respiratory intensive Care Unit           | To "describe[...] how a group of nurses...changed their ICU [Intensive Care Units] visitation policy with minimal resistance or transitional trauma" (p.369)                                                   | Process              |
| Rotenstein et al. (2019) <sup>20</sup>    | An Academic Medical Center-Based Incubator to Promote Clinical Innovation and Financial Value                                                         | 1c. Evaluative                      | USA-Brigham Health                                        | To evaluate "the Brigham Care Redesign Incubator and Startup Program (BCRISP), a flexible model to test, evaluate, and scale innovative care redesign proposals" (p.1)                                         | Process and benefits |
| Shiparski and Autier (2013) <sup>87</sup> | Mentoring frontline managers: The vital force in stimulating innovation at the point of care                                                          | 1a. Descriptive                     | Not applicable                                            | To "offer[...] insights and practical applications while exploring the innovation keystones" (p.28)                                                                                                            | Enablers             |
| Small et al. (2017) <sup>88</sup>         | How a Startup Accelerator at Boston Children's Hospital Helps Launch Companies                                                                        | 1a. Descriptive                     | USA-Boston Children's Hospital                            | To discuss the launch of the Innovation & Digital Health Accelerator (IDHA) and the factors that "led to score enough successes to prove that the model can work" (p.n.a.)                                     | Process and enablers |

|                                      |        |                                                                                                                                                            |                                              |                                   |          |                                                                                                                                                                                                                           |                      |
|--------------------------------------|--------|------------------------------------------------------------------------------------------------------------------------------------------------------------|----------------------------------------------|-----------------------------------|----------|---------------------------------------------------------------------------------------------------------------------------------------------------------------------------------------------------------------------------|----------------------|
| Snell (2015) <sup>15</sup>           |        | Leading the Way: Implementing a Domestic Violence Assessment Pilot Project by Public Health Nurses                                                         | 1a. Descriptive                              | Canada-Community health centres   |          | To “describe the process through which a group of front-line PHNs [Public Health Nurses] lead the development and implementation of a pilot project to address domestic violence within their practice areas” (p.66)      | Process and enablers |
| Syme and Stiles (2012) <sup>89</sup> |        | Promoting nursing research and innovation by staff nurses                                                                                                  | 1b. Descriptive                              | Canada-Tom Baker Cancer Centre    |          | To “discuss[...] how a research and innovation fund supported nurses and radiation therapists in their endeavor to conduct research and develop new ideas for clinical and other practices” (p.18)                        | Enablers             |
| Telljohan (2010) <sup>90</sup>       |        | Employee-driven innovation in the context of Italian industrial relations: The case of a public hospital                                                   | 1a. Descriptive                              | Italy-Guastalla Hospital          |          | To “look at the role played by various forms of participation in [the] experiences of employee-driven innovation in Italy” (p.228)                                                                                        | Process and benefits |
| Terwiesch (2013) <sup>43</sup>       | et al. | Innovating in health delivery: The Penn medicine innovation tournament                                                                                     | 1a. Descriptive                              | USA-Penn Medecine                 |          | To “describe a ‘bottom-up’ approach to improve the patient experience” (p.38)                                                                                                                                             | Process              |
| Thompson (2016) <sup>91</sup>        | et al. | Planning, designing, building, and moving a large volume maternity service to a new labor and birth unit                                                   | 1b. Descriptive                              | USA-Mercy St. Louis               | Hospital | To relate “key processes and roles responsible for a successful build ... of a new labor and birth unit in a large volume perinatal service” (p.322)                                                                      | Process              |
| Thompson (2015) <sup>92</sup>        | et al. | Multiple sclerosis outpatient future groups: Improving the quality of participant interaction and ideation tools within service improvement activities     | 1b. Descriptive and evaluative (qualitative) | UK-Royal Hospital (RLH)           | London   | To “describe... design-led methods to engage staff and patient participants in service improvement activities” (p.10)                                                                                                     | Process              |
| Upenieks (2008) <sup>3</sup>         | et al. | The relationship between the volume and type of transforming care at the bedside innovations and changes in nurse vitality                                 | 1c. Evaluative (mixed methods)               | USA-Hospitals                     |          | To “evaluate the number and type of innovations tested on the medical-surgical units participating in TCAB and examine the relationship between the innovations tested and change in staff vitality on the units” (p.387) | Benefits             |
| Wiechula (2009) <sup>93</sup>        | et al. | Improving the fundamentals of care for older people in the acute hospital setting: Facilitating practice improvement using a knowledge translation toolkit | 1c. Evaluative (qualitative)                 | Australia-Tertiary acute hospital |          | To “explore and describe the implementation of a pragmatic KT intervention” (p.284)                                                                                                                                       | Process and enablers |

*Table S5: Conference papers*

| <b>Authors and date</b>                            | <b>Title</b>                                                                                            | <b>Category of study &amp; Design</b>  | <b>Country &amp; Focused institution (s)</b> | <b>Objectives</b>                                                                                                                                                                | <b>Study key focus</b> |
|----------------------------------------------------|---------------------------------------------------------------------------------------------------------|----------------------------------------|----------------------------------------------|----------------------------------------------------------------------------------------------------------------------------------------------------------------------------------|------------------------|
| <b>Eriksen and Tollestrup (2012)</b> <sup>94</sup> | Creating an innovative attitude at work                                                                 | Descriptive (qualitative)              | Denmark-Aalborg Hospital                     | To examine “the introduction of creative methods and approaches to the staff in a major public service institution” (p.n.a.)                                                     | Process                |
| <b>Fukuda et al. (2015)</b> <sup>95</sup>          | Text-mining of hand-over notes for care-workers in real operation: Toward an employee-driven innovation | Descriptive (qualitative)              | Japan- Wakoen care home                      | To “report several use-cases of text-mining of hand-over messages where the employee actually designed a new service process based on the hand-over text-mining analysis” (p.36) | Process                |
| <b>Grisot et al. (2013)</b> <sup>96</sup>          | Staying under the radar: Innovation strategy in information infrastructures for health                  | Conceptual and empirical (qualitative) | Norway-IT department of a large hospital     | To “present[...]the design, development, and initial use of a platform for patient-health provider communication” (p.1)                                                          | Enablers               |
| <b>Lahtinen et al. (2014)</b> <sup>97</sup>        | Co-designing Employee-driven Service Development Instruments for Public Health Care                     | Conceptual and empirical (qualitative) | Finland-Tampere University Hospital          | To “present[...] an action research on co-designing employee-driven service development instruments for public health care professionals” (p.1)                                  | Process and enablers   |
