# Supplementary material for: Employee-Driven Innovation in Health Organizations: Insights From a Scoping Review
Source: PubMed Central journal article supplement (PMC10425658; doi:10.34172/ijhpm.2023.6734), 2023-05-15
Supplement: ijhpm-12-6734-s003.pdf [file ijhpm-12-6734-s003.pdf]

**Article title:** Employee-Driven Innovation in Health Organizations: Insights From a Scoping Review

**Journal name:** International Journal of Health Policy and Management (IJHPM)

**Authors' information:** Stephanie B.M. Cadeddu<sup>1,2\*</sup>, Labante Outcha Dare<sup>3</sup>, Jean-Louis Denis<sup>1,2,4</sup>

<sup>1</sup>Health Hub: politics, organizations, and law (H-POD), University of Montreal, Montreal, QC, Canada.

<sup>2</sup>University of Montreal Hospital Research Centre (CRCHUM), Montreal, QC, Canada.

<sup>3</sup>School of Public Health, University of Montreal, Montreal, QC, Canada.

<sup>4</sup>Department of Health Management, Evaluation and Policy, School of Public Health, University of Montreal, Montreal, QC, Canada

(\*Corresponding author: [stephanie.cadeddu@gmail.com](mailto:stephanie.cadeddu@gmail.com))

**Supplementary file 3.** Overview of EDI Methods

**Table S6: Top-down EDI methods**

| Components<br>Methods                       | Team-based<br>(n=7)                                                                                                  | Learning-based<br>(n=10)                                                                                                                                                                                                 | Digital<br>(n=6)                                                                                                                                                      | No mention of learning,<br>team, or digital components<br>(n=11)                                                                                                                                                                                                                                             |
|---------------------------------------------|----------------------------------------------------------------------------------------------------------------------|--------------------------------------------------------------------------------------------------------------------------------------------------------------------------------------------------------------------------|-----------------------------------------------------------------------------------------------------------------------------------------------------------------------|--------------------------------------------------------------------------------------------------------------------------------------------------------------------------------------------------------------------------------------------------------------------------------------------------------------|
| <b>Participatory (n=9)</b>                  | 1. A working group was set up and used the Search conference methodology <sup>90</sup>                               | 1. Learning employee-driven innovating process <sup>77</sup><br>2. Participatory deliberative approach with a logic of training <sup>35</sup>                                                                            | 1. Computer-mediated communication that created a discussion forum <sup>51</sup><br>2. Digital approach: workshop on text-mining from digital hand-note <sup>95</sup> | 1. Focus group with healthcare workers in the targeted long-term healthcare unit <sup>80</sup><br>2. Participatory action research <sup>81</sup><br>3. Integration of various stakeholders in decision-making <sup>91</sup>                                                                                  |
|                                             | 1. Teaching and mentoring a “Frontline Innovation” group <sup>66</sup>                                               |                                                                                                                                                                                                                          |                                                                                                                                                                       |                                                                                                                                                                                                                                                                                                              |
| <b>Design tool (n=7)</b>                    | -                                                                                                                    | 1. Trained to use a design process <sup>94</sup><br>2. Teaching Design-Thinking <sup>65</sup>                                                                                                                            | 1. A technology-assisted design methodology via the user-driven product/activity design (UPAD) approach <sup>59</sup>                                                 | 1. User-centered collaborative design <sup>63</sup><br>2. Design Thinking <sup>71</sup><br>3. Design Thinking <sup>70</sup>                                                                                                                                                                                  |
|                                             |                                                                                                                      | 1. Developing a digital tool using design thinking while learning how to use the tool for innovation <sup>97</sup>                                                                                                       |                                                                                                                                                                       |                                                                                                                                                                                                                                                                                                              |
| <b>Participatory (n=1) and design (n=1)</b> | 1. Creating “future groups” and combining focus group and design-led techniques <sup>92</sup>                        | -                                                                                                                                                                                                                        | -                                                                                                                                                                     | -                                                                                                                                                                                                                                                                                                            |
| <b>Competition-based (n=7)</b>              | 1. Multidisciplinary teams invited to apply to The Brigham Care Redesign Incubator and Startup Program <sup>20</sup> | -                                                                                                                                                                                                                        | 1. Idea contest using a crowdsourcing platform <sup>75</sup>                                                                                                          | 1. Innovation contest <sup>50</sup><br>2. Solicitation of brief innovation proposals <sup>83</sup><br>3. Grant application at the Innovation & Digital Health Accelerator <sup>88</sup><br>4. Grant-based method for research and innovation project <sup>89</sup><br>5. Innovation tournament <sup>43</sup> |
| <b>Quality improvement (n=5)</b>            | 1. Seven teams were formed to use the Knowledge Translation Toolkit <sup>93</sup>                                    | 1. Trained to lead local improvement portfolios while following Plan-do study-act (PDSA) cycles <sup>72</sup><br>2. Innovation community meeting for learning were established along the use of PDSA cycles <sup>3</sup> | 1. Kaiser’s quality improvement program using video-ethnography <sup>85</sup>                                                                                         | -                                                                                                                                                                                                                                                                                                            |

|                                                                  |                                                                                                                            |                                                                              |   |   |
|------------------------------------------------------------------|----------------------------------------------------------------------------------------------------------------------------|------------------------------------------------------------------------------|---|---|
|                                                                  | 1. Creation of Unit-Based Teams that are trained to use improvement tools <sup>79</sup>                                    |                                                                              |   |   |
| <b>Others (change management, social entrepreneurship) (n=2)</b> | 1. A working group led by clinicians was set up and the process was inspired by managerial change techniques <sup>69</sup> | 1. To innovate following the Social Entrepreneurship programme <sup>24</sup> | - | - |

**Table S7: Hybrid EDI methods**

| <b>Components</b>                        | <b>Team-based (n=5)</b>                                                                                                                                                                      | <b>Learning-based (n=0)</b> | <b>Digital (n=0)</b> | <b>No mention of learning, team, or digital components</b>                                                                      |
|------------------------------------------|----------------------------------------------------------------------------------------------------------------------------------------------------------------------------------------------|-----------------------------|----------------------|---------------------------------------------------------------------------------------------------------------------------------|
| <b>Methods</b>                           |                                                                                                                                                                                              |                             |                      |                                                                                                                                 |
| <b>Participatory methods (n=2)</b>       | -                                                                                                                                                                                            | -                           | -                    | 1. Regularly scheduled meetings to discuss and explore challenges <sup>61</sup><br>2. Positive Deviance technique <sup>82</sup> |
| <b>Quality improvement methods (n=1)</b> | 1. Hiring of a multidisciplinary team using the PDSA model <sup>64</sup>                                                                                                                     | -                           | -                    | -                                                                                                                               |
| <b>Indistinguishable methods</b>         | 1. Formation of a Nursing Practice Committee <sup>73</sup><br>2. Formation of a multidisciplinary committee <sup>86</sup><br>3. Formation of a domestic violence working group <sup>15</sup> | -                           | -                    | -                                                                                                                               |
|                                          | 1. Building a team and using evidence-based review <sup>68</sup>                                                                                                                             | -                           |                      |                                                                                                                                 |

**Table S8: Bottom-up EDI methods**

| <b>Components</b>                        | <b>Team-based (n=1)</b>                                   | <b>Learning-based (n=0)</b> | <b>Digital (n=0)</b> | <b>No mention of learning, team, or digital components</b>                            |
|------------------------------------------|-----------------------------------------------------------|-----------------------------|----------------------|---------------------------------------------------------------------------------------|
| <b>Methods</b>                           |                                                           |                             |                      |                                                                                       |
| <b>Quality improvement methods (n=1)</b> | 1. Using quality improvement tools in teams <sup>79</sup> | -                           | -                    | -                                                                                     |
| <b>Indistinguishable methods</b>         | -                                                         | -                           | -                    | 1. Experimental process <sup>56,97</sup><br>2. Social innovation theory <sup>25</sup> |
